# 1 **Interannual climate variability data improves niche estimates in species** 2 **distribution models**

3  
4 Dirk Nikolaus Karger<sup>1\*</sup>, Bianca Saladin<sup>1</sup>, Rafael O. Wüest-Karpati<sup>1</sup>, Catherine H. Graham<sup>1</sup>,  
5 Damaris Zurell<sup>1,2</sup>, Lidong Mo<sup>1,3</sup>, Niklaus E. Zimmermann<sup>1</sup>

6  
7 <sup>1</sup>Swiss Federal Research Institute WSL, Zürcherstrasse 111, 8903 Birmensdorf, Switzerland

8 <sup>2</sup>University of Potsdam, Am Neuen Palais 10, 14469 Potsdam, Germany

9 <sup>3</sup>Swiss Federal Institute of Technology in Zurich, Department of Environmental Systems  
10 Science, Universitätstrasse 16, 8092 Zürich, Switzerland

11 \*corresponding author: [dirk.karger@wsl.ch](mailto:dirk.karger@wsl.ch)

12

## 13 **Abstract**

### 14 **Aim**

15 Climate is an essential element of species' niche estimates in many current ecological  
16 applications such as species distribution models (SDMs). Climate predictors are often used in  
17 the form of long-term mean values. Yet, climate can also be described as spatial or temporal  
18 variability for variables like temperature or precipitation. Such variability, spatial or temporal,  
19 offers additional insights into niche properties. Here, we test to what degree spatial variability  
20 and long-term temporal variability in temperature and precipitation improve SDM predictions  
21 globally.

### 22 **Location**

23 Global.

### 24 **Time period**

25 1979-2013

### 26 **Major taxa studies**

27 Mammal, Amphibians, Reptiles

### 28 **Methods**

29 We use three different SDM algorithms, and a set of 833 amphibian, 779 reptile, and 2211  
30 mammal species to quantify the effect of spatial and temporal climate variability in SDMs. All

31 SDMs were cross-validated and assessed for their performance using the Area under the Curve  
32 (AUC) and the True Skill Statistic (TSS).

### 33 **Results**

34 Mean performance of SDMs with climatic means as predictors was TSS=0.71 and AUC=0.90.  
35 The inclusion of spatial variability offers a significant gain in SDM performance (mean  
36 TSS=0.74, mean AUC=0.92), as does the inclusion of temporal variability (mean TSS=0.80,  
37 mean AUC=0.94). Including both spatial and temporal variability in SDMs shows similarly  
38 high TSS and AUC scores.

39

### 40 **Main conclusions**

41 Accounting for temporal rather than spatial variability in climate improved the SDM prediction  
42 especially in exotherm groups such as amphibians and reptiles, while for endothermic mammals  
43 no such improvement was observed. These results indicate that more detailed information about  
44 temporal climate variability offers a highly promising avenue for improving niche estimates  
45 and calls for a new set of standard bioclimatic predictors in SDM research.

## 46 **Introduction**

47 Climate is known to influence species' distributions (Woodward & Woodward, 1987) across  
48 different spatial and temporal scales, thus, detecting the impact of climate on species depends  
49 to a large degree on the spatial and temporal scale at which it is assessed (Wiens, 1989; Rahbek,  
50 2005). While the effect of spatial variability in climate on species distributions has received  
51 heightened attention in recent years due to the ever increasing spatial resolution of freely  
52 available climate data (e.g. Hijmans *et al.*, 2005; Fick & Hijmans, 2017; Karger *et al.*, 2017),  
53 analyses of the effect of temporal climate variability on species ranges have been much less  
54 abundant (Zimmermann *et al.*, 2009). Analytically, an increase in resolution in one dimension  
55 often comes at the cost of decreased resolution in the other dimension due to computational  
56 limitations (Hourdin *et al.*, 2017; Schär *et al.*, 2019). However, a focus on ever increasing  
57 spatial resolution may leave time-dependent phenomena undetected (Wiens, 1989). This is  
58 especially of concern since one of the major components of climate change is an increase in  
59 climate variability and – in consequence – an increase of extremes (Rahmstorf & Coumou,  
60 2011; Seneviratne *et al.*, 2012). Increasing frequencies and severities of extreme events may  
61 cause greater physiological stress and may thus result in rapid responses in many species with  
62 likely severe consequences for their spatial distribution (Reyer *et al.*, 2013; Alexander *et al.*,  
63 2015).

64 The spatial ranges of species are commonly estimated using empirical species distribution  
65 models (SDMs), sometimes also termed bioclimatic envelope or habitat suitability models  
66 (Guisan & Zimmermann, 2000; Guisan & Thuiller, 2005). SDMs characterize the  
67 environmental niche of a species (Hutchinson, 1957) usually with respect to a few key  
68 environmental factors, such as temperature and precipitation. It has become common practice  
69 to use a limited set of climate variables as predictor variables (Araújo & Guisan, 2006) based  
70 on long-term means (climatologies) alone (Ashcroft *et al.*, 2011). Such an aggregation of  
71 climate variability into long-term climatological means fully removes information on the  
72 temporal signal, including inter-annual variability. Species are known to strongly differ in  
73 degree to which they can tolerate climatic extremes, and this affects their life cycles, coping  
74 strategies through functional adaptations and, ultimately, their spatial distribution. Yet when  
75 using long term climatic means, our capacity to distinguish effects from differences in climate  
76 variability on species' distributions is basically removed.

77 Climatologies do not only smooth out temporal variabilities in climate but also reduce spatial  
78 variability. Spatial climate heterogeneity as a result of small-scale topography and other factors  
79 are not represented in gridded datasets of coarse spatial grain. Coarse spatial grains cannot

80 resolve the richness in topography, and thus climate, environment, and habitats, that are  
81 essential for quantifying species' environmental niches (Stein *et al.*, 2014; Stein & Kreft, 2015).  
82 Such misrepresentation of spatial heterogeneity when representing or aggregating climate  
83 predictors at coarse grain might more strongly impact niche estimates in the tropics compared  
84 to temperate or boreal zones (Janzen, 1967). In the tropics, species generally experience a lower  
85 degree of intra- and interannual climatic variation due to the rather stable environmental  
86 conditions they encounter throughout the year (Janzen, 1967; Wiens, 1989). In temperate  
87 climates however, the conditions a species experiences are much more variable due to the larger  
88 intra- and interannual variation in climate (Janzen, 1967). Species occurring in tropical  
89 ecosystems, therefore often have a much narrower climatic niche (Stevens, 1989; Cadena *et al.*,  
90 2012). In turn, this also implies that the influence of temporal variability might be greater in  
91 areas where species are not well adapted to variation in climate. Therefore, along large-scale  
92 geographic gradients both spatial and temporal variability can become important in estimations  
93 of a species environmental niche.

94 Climate does not only influence the distribution of species, but also has a profound impact on  
95 how specific traits evolve over time as adaptations to climate itself (Kozak & Wiens, 2010;  
96 Rolland *et al.*, 2018; Liu *et al.*, 2020). While climate is an important factor in the diversification  
97 of species (Liu *et al.*, 2020), many adaptations can also be directly linked to environmental  
98 factors. A prominent example is the evolution of endothermy, which allows to some degree, the  
99 decoupling of a species internal temperature from that of its surrounding habitat (McNab, 1978;  
100 Ruben, 1995), which in turn leads to different responses of species to a climatic factor. Hence,  
101 overall, spatial and temporal variabilities may not only act as species range determinants in  
102 isolation, but also interact with each other. With climatic data becoming available at  
103 increasingly higher spatial and temporal resolution, the opportunity arises to generate an  
104 improved understanding of the role of spatial and temporal climatic variability on the  
105 distribution of species. Here, we evaluate if considering temporal, and spatial variation in  
106 addition to classical coarse-grained climate mean values improves the performance of SDMs  
107 when using coarse-grained species distribution data.

108 Based on the potential effects of spatial and temporal climate variability on species discussed  
109 before, we hypothesize that

- 110 i) both the inclusion of spatial and temporal variability positively affect the  
111 performance of SDMs,
- 112 ii) the performance of ectotherm SDMs increases more strongly when accounting for  
113 spatial and temporal variability than the performance of endotherm SDMs, and

114       iii)     SDMs for tropical and mountain species will benefit more strongly from including  
115               variability than SDMs of species from other habitats.

116     We test these hypotheses by modelling the distribution of 833 amphibian, 779 reptile, and 2211  
117     mammal species as a function of current climate using four different predictor groups composed  
118     of different combinations of input variables: mean climate, spatial climatic variability and  
119     temporal (interannual) climatic variability.

## 120     **Methods**

### 121     **Species data**

122     We used global distribution maps provided by the Amphibian, Mammal, and Reptile Red List  
123     Assessment (IUCN, 2016). Grid cells within the distribution range of each species were  
124     converted to 0.5° grid cells, which is close to 50 km at the equator, a resolution suggested as  
125     appropriate (Hurlbert & Jetz, 2007) and often used (Fritz & Rahbek, 2012; Zurell *et al.*, 2018;  
126     Thuiller *et al.*, 2019) when gridding polygon range maps at the global scale. Grid cells  
127     intersecting with a range map polygon were assigned as presence cells, while those not  
128     intersecting were treated as absence cells. We only considered species for which the presences  
129     cover at least 72 0.5° grid cells so that a minimum of six data points per predictor variable  
130     (including quadratic terms) was available for model building. We also removed domestic and  
131     aquatic species.

### 132     **Climate predictor groups**

133     We used global climate data from CHELSA V1.2 (Karger *et al.*, 2017a,b) and built several  
134     groups of predictors (Fig. 1, Table 1) by aggregating CHELSA to the 0.5° grid of the species  
135     data by taking the mean of all 30 arc second grid cells overlapping with a 0.5° grid cell. To  
136     calculate sub-grid heterogeneity of a climatic variable (hereafter: spatial) within a 0.5° grid cell,  
137     we used the standard deviation of all CHELSA 30 arc second grid cells overlapping with 0.5°  
138     grid cells. To calculate the interannual variability (hereafter: temporal) we calculated the  
139     standard deviation of mean annual 2m air temperature for each year from 1979 to 2013 from  
140     CHELSA V1.2 per grid cell. For temporal precipitation variability we used the relative standard  
141     deviation (temporal RSD, equivalent to the coefficient of variation) of the annual precipitation  
142     sum across all years from 1979 to 2013 from CHELSA V1.2 per grid cell. Based on the data  
143     aggregated as explained above, we generated four different groups of predictors for annual

144 temperature and precipitation, with different combinations of spatial and temporal variabilities  
145 (Table 1).

146 **Table 1.** Characterization of the four predictor groups used with the respective variables  
 147 included in each group as well as the temporal or spatial unit over which they were aggregated.  
 148 All variables are based on CHELSA V1.2 (Karger *et al.*, 2017a).

| Predictor group | variables included                                               | aggregation unit                                  |
|-----------------|------------------------------------------------------------------|---------------------------------------------------|
| mean            | mean annual 2m air temperature 1979-2013                         | -                                                 |
|                 | mean annual precipitation sum 1979-2013                          | -                                                 |
| spatial         | mean annual 2m air temperature 1979-2013                         | -                                                 |
|                 | mean annual precipitation sum 1979-2013                          | -                                                 |
|                 | standard deviation mean annual 2m air temperature 1979-2013      | all 0.0083334° grid cells within a 0.5° grid cell |
|                 | standard deviation mean annual precipitation sum 1979-2013       | all 0.0083334° grid cells within a 0.5° grid cell |
|                 | coefficient of variation mean annual precipitation sum 1979-2013 | all years from 1979-2013                          |
| temporal        | mean annual 2m air temperature 1979-2013                         | -                                                 |
|                 | mean annual precipitation sum 1979-2013                          | -                                                 |
|                 | standard deviation mean annual 2m air temperature 1979-2013      | all years from 1979-2013                          |
|                 | coefficient of variation mean annual precipitation sum 1979-2013 | all years from 1979-2013                          |
|                 | coefficient of variation mean annual precipitation sum 1979-2013 | all years from 1979-2013                          |
| sp-temp         | mean annual 2m air temperature 1979-2013                         | -                                                 |
|                 | mean annual precipitation sum 1979-2013                          | -                                                 |
|                 | standard deviation mean annual 2m air temperature 1979-2013      | all 0.0083334° grid cells within a 0.5° grid cell |
|                 | standard deviation mean annual precipitation sum 1979-2013       | all 0.0083334° grid cells within a 0.5° grid cell |
|                 | standard deviation mean annual 2m air temperature 1979-2013      | all years from 1979-2013                          |
|                 | coefficient of variation mean annual precipitation sum 1979-2013 | all years from 1979-2013                          |
|                 | coefficient of variation mean annual precipitation sum 1979-2013 | all years from 1979-2013                          |

149

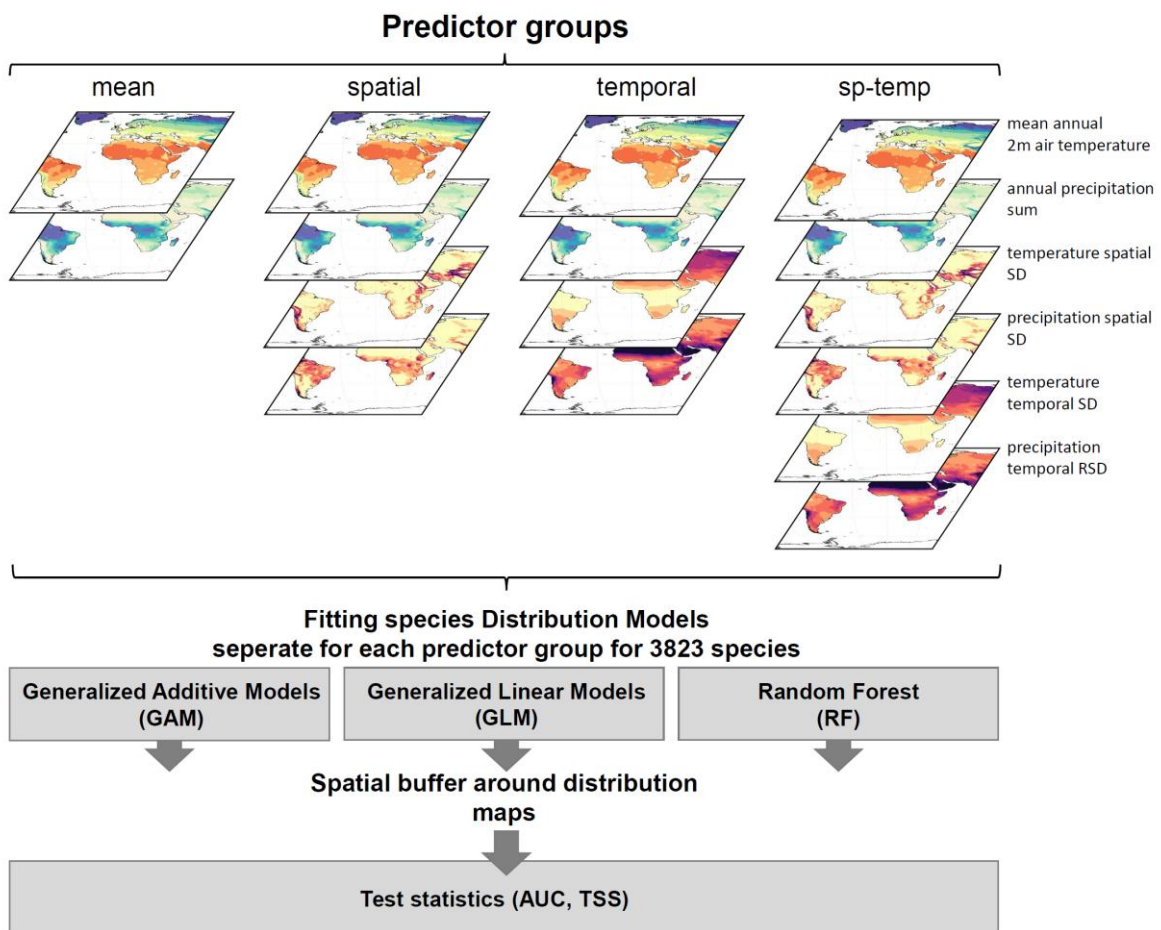

150

151 **Fig. 1.** Schematic representation of the analytical setup. Four predictor groups were formed  
152 and three algorithms for species distribution models (SDMs) were fitted from range maps for  
153 3823 species of mammals, amphibians, and reptiles. The different SDMs were predicted  
154 spatially and their predictive performance assessed within a buffer of 3000 km around observed  
155 ranges, using the area under the curve (AUC) and the true skill statistic (TSS) as performance  
156 measures.

157

### 158 **Species distribution modelling**

159 We used three algorithms to relate presences and absences with the selected environmental  
160 predictor sets: Generalized Linear models (GLM) (Nelder & Wedderburn, 1972), Generalized  
161 Additive Models (GAM) (Hastie & Tibshirani, 1990), and Random Forests (RF) (Breiman,  
162 2001). GLMs were run using linear and quadratic terms, GAMs were run using thin plate splines  
163 setting an upper limit of 4 degrees of freedom ( $k=5$ ). In both cases, we set weights such that the  
164 sum of weights of presences equaled the sum of weights of absences (Barbet-Massin *et al.*,



165 2012). A classification RF was fitted using 1500 trees, while sub-sampling was restricted to  
166 contain equal numbers of presences and absences.

167 To assess model performance, we tested SDM predictions only within a buffer around each  
168 species' range polygon. By doing so we account for biogeographic history and explicitly test  
169 how well a model predicts the actual range of a species rather than how well it also makes  
170 predictions far outside a species' range, yet with suitable climate. We applied a buffer of  
171 3000km around each range polygon and fitted and tested SDMs only within this extent.

172 We evaluated the predictive performance of the SDMs using repeated split-sample tests: we  
173 split the data repeatedly into 80% training and 20% test data, fitted the model on the training  
174 data, and predicted it to the test data. This procedure was repeated 30 times, while we recorded  
175 predictive performance of each repeat. Predictive performance was assessed using a) the true  
176 skills statistic (TSS) (Allouche *et al.*, 2006), after thresholding the predictions into  
177 presence/absence using a TSS-optimized threshold, and b) the area under the curve (AUC)  
178 (Swets, 1988). We provide the full SDM description following the ODMAP protocol (Zurell *et*  
179 *al.*, 2020)(Zurell *et al.* 2020) in Appendix S2.

## 180 **Performance tests of predictor groups**

181 We used a linear mixed effects model (Bates *et al.*, 2015) with either TSS or AUC as response  
182 variable and the predictor group as fixed effects together with the SDM algorithm (GLM, GAM,  
183 RF) and the species identity as random effects. Adding the type of SDM (GLM, GAM, or RF)  
184 as random effect on the intercept considers that algorithms can perform differently well (e.g.  
185 have a different mean performance between AUC or TSS, Thuiller *et al.*, 2019). To always  
186 compare the same species, but modeled with different sets of predictor groups, we also added  
187 the identity of the species as random affect to the intercept. To check if there are differences in  
188 SDM performance across climatologies, we ran a paired Wilcoxon test. By this, we tested if  
189 one climatology performs better than another.

190 All analyses have been performed using the R language for statistical computing (R Core Team,  
191 2015, version 3.6.1), the R packages raster (Hijmans & van Etten, 2014), mgcv (Wood & Wood,  
192 2015), and randomForest (randomForest: Breiman and Cutler's Random Forests for  
193 Classification and Regression).

## 194 **Spatial performance of different predictor groups**

195 To test if different predictor groups have different performances in different regions, we used  
196 the gridded range map at 0.5° resolution from IUCN and assigned the value of the respective

197 test metric (TSS, AUC) to the entire range in which a species is present. All ranges were then  
198 stacked and the mean of all TSS and AUC values covering a  $0.5^\circ$  grid cell calculated.

## 199 Results

### 200 Spatial patterns of the predictor groups

201 While mean annual 2m air temperatures and annual precipitation sums were generally higher  
202 in the tropics and decrease towards the poles (Fig. 2, upper), the spatial SD of these two  
203 variables is usually highest in mountainous terrain (Fig. 2, middle). Interannual variability  
204 (temporal SD) of temperature is generally higher in the northern hemisphere compared to the  
205 southern hemisphere, and increases from tropics to continental arctic or boreal areas. Variability  
206 (temporal RSD) of precipitation is more idiosyncratic, with lowest values estimated in desert  
207 areas.

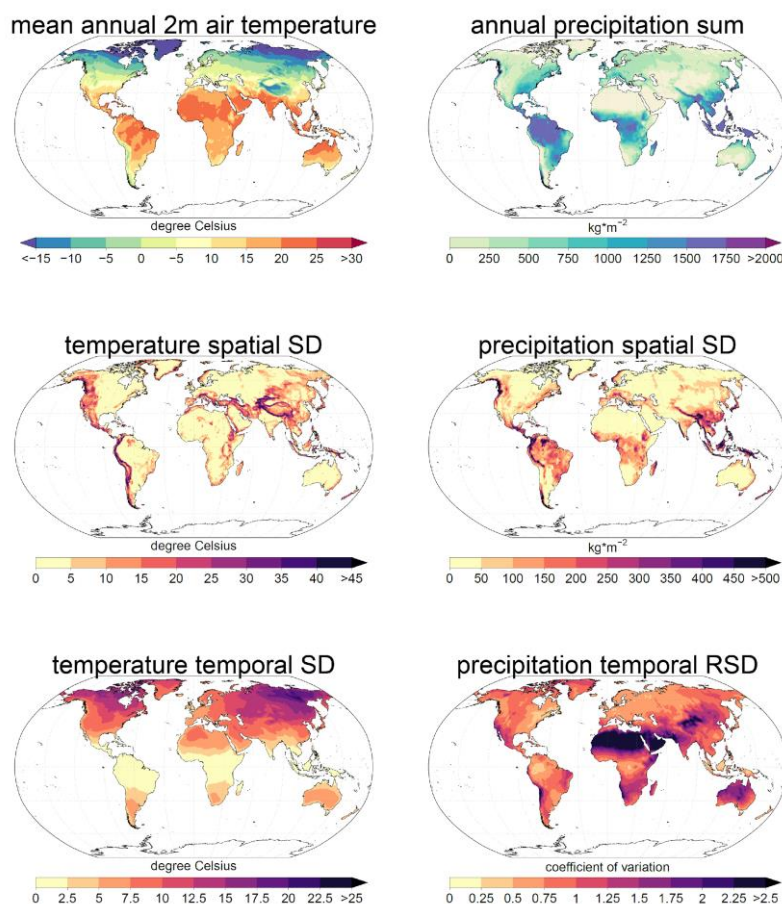

208  
209 **Fig. 2.** Spatio-temporal variation in 2m air temperature and precipitation used as predictors in  
210 the different SDMs based on CHELSA V1.2. Mean annual values (upper row) show the annual  
211 mean for temperature, and the mean annual sum for precipitation averaged over the years 1979-  
212 2013 and aggregated to  $0.5^\circ$  from a 30 arc second spatial grain by taking the mean of a  $0.5^\circ$   
213 grid cell. Spatial variation (middle) indicates the standard deviation (SD) of all temperature

214 values of a 30 arc second grid of temperature or precipitation overlapping with a 0.5° grid cell.  
215 Temporal variation (lower row) shows the standard deviation (SD) of temperature over years  
216 between 1979-2013, and the relative standard deviation (RSD) calculated as the coefficient of  
217 variation for precipitation over the same time period.

218

### 219 **Performance scores of the SDMs with different predictor groups**

220 Overall the predictive performance of the SDMs was high with an average AUC of 0.92 and  
221 ranging on from 0.90 to 0.95 between different groups of predictors, SDMs, and climatologies.  
222 For TSS, values averaged 0.75 with a minimum 0.68 and a maximum of 0.82 for the different  
223 predictor groups.

224 SDMs based on mean climate predictors performed worst among all groups, with average AUC  
225 and TSS scores of 0.90 and 0.71, respectively (GAM: 0.91; 0.73, GLM: 0.90; 0.73, RF: 0.90;  
226 0.68). SDMs based on mean climate predictors plus spatial predictors performed slightly better,  
227 with average AUC and TSS scores of 0.92 and 0.74 (GAM: 0.93; 0.77, GLM: 0.92; 0.76, RF:  
228 0.91; 0.70). SDMs based on mean climate predictors plus temporal predictors performed  
229 slightly better, with average AUC and TSS scores of 0.94 and 0.80 (GAM: 0.94; 0.81, GLM:  
230 0.94; 0.81, RF: 0.94; 0.77). SDMs containing mean climate predictors plus spatial and temporal  
231 predictors performed similar as the SDMs with mean and temporal predictors, with average  
232 AUC and TSS scores of 0.94 and 0.80 (GAM: 0.95; 0.82, GLM: 0.93; 0.81, RF: 0.94; 0.77).

233 The results of the linear mixed effects model to assess the SDM performance with different  
234 predictor groups showed that adding predictors that account for either spatial or temporal  
235 variation increased predictive performance of models across all groups of vertebrates. Models  
236 based on the temporal predictor group outperformed models based on the spatial predictor  
237 group for amphibians and reptiles, but not for mammals (equal performance). Models that  
238 included predictors that accounted for both spatial and temporal variation (sp-temp predictor  
239 group) performed best across all vertebrate groups. Fig. 3 illustrates these results using effect-  
240 size plots (below boxplots) for TSS, while results for AUC are equivalent (see Supplemental  
241 Figure S1).

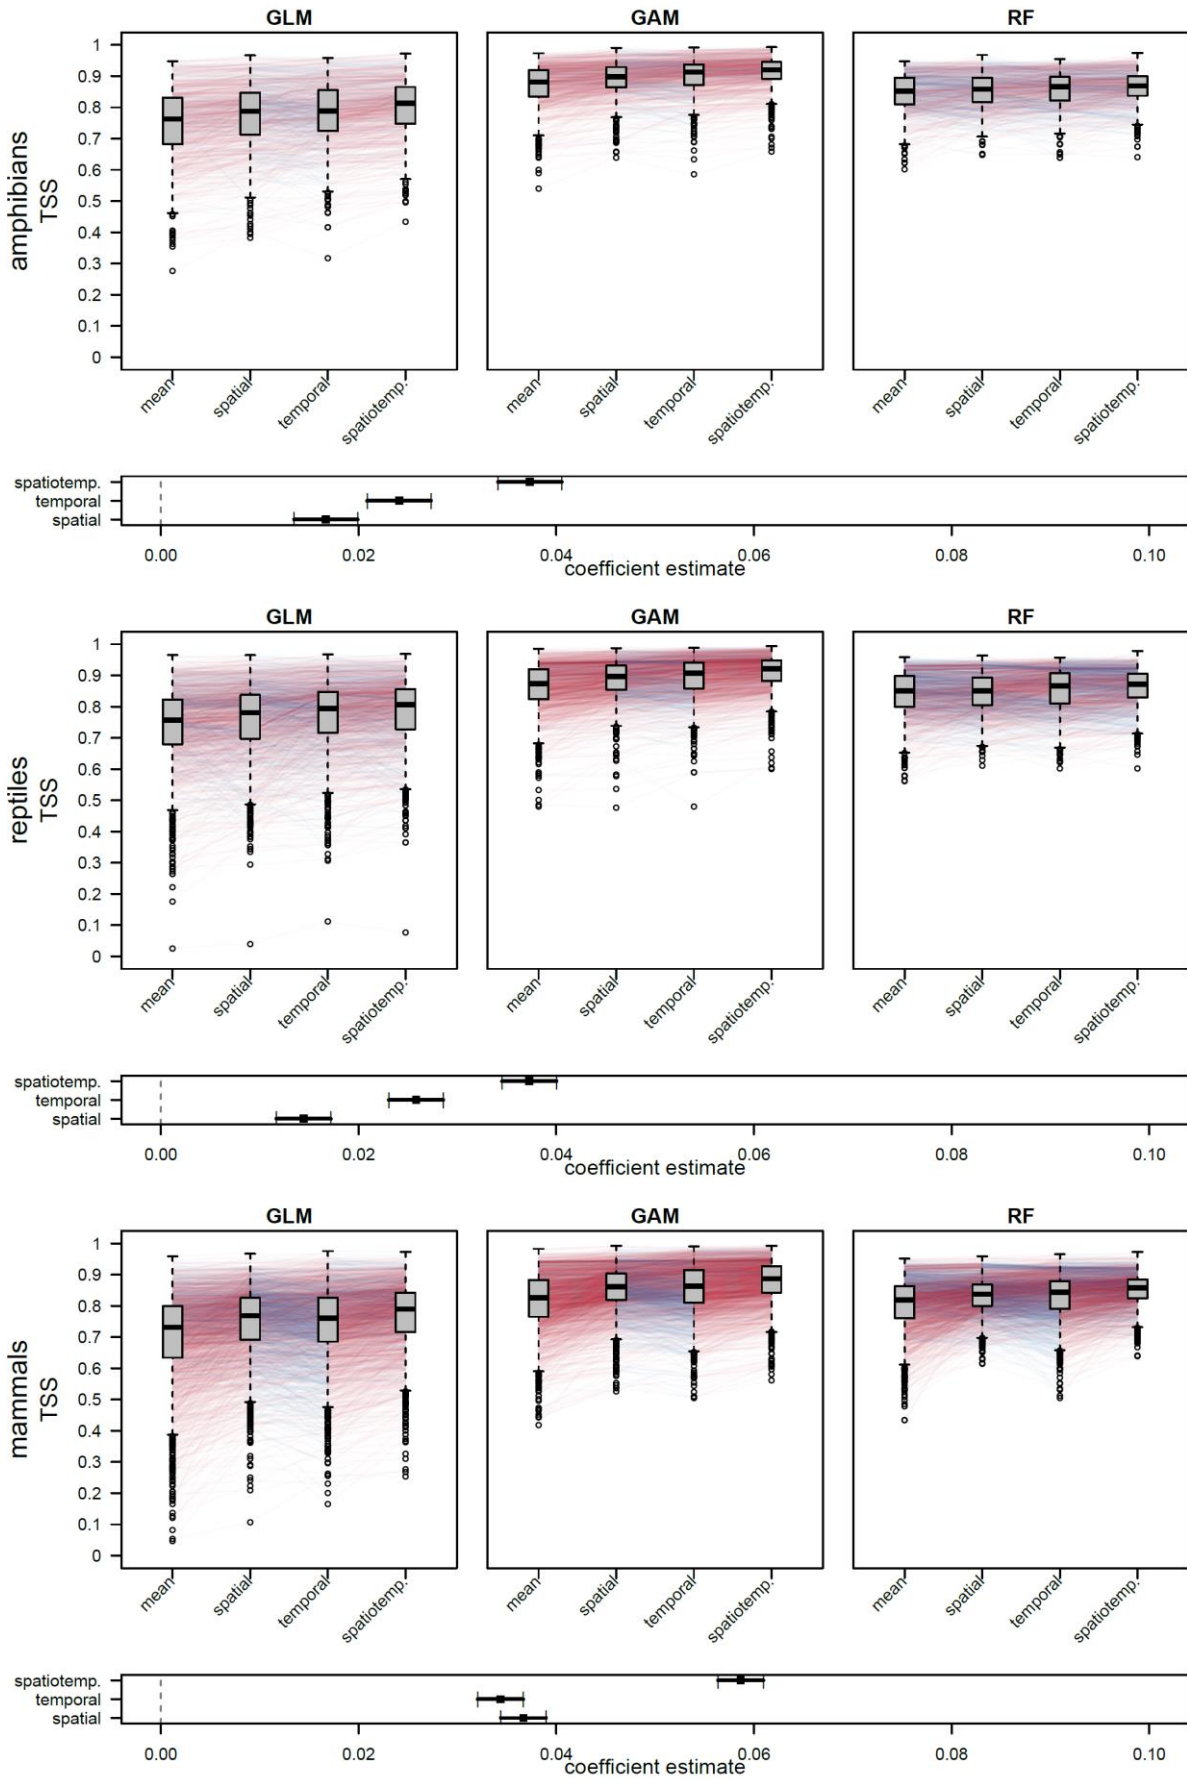

243 **Fig. 3.** Comparison of the performance of three different SDM algorithms (GLM = Generalized  
244 linear model, GAM = Generalized additive model, RF = Random Forests) calculated with four  
245 different sets of predictors for amphibians, reptiles, and mammals measured by the True Skill  
246 Statistic (TSS). Colored lines connect pairs of SDMs based on different predictor sets for the  
247 same species, with red and blue lines indicating pairs in which TSS values increased and  
248 decreased between predictor groups from left to right. Plots below the boxplots shows the  
249 coefficient estimates of a linear mixed effects model with TSS as response, the groups (mean,  
250 spatial, temporal, sp-temp) as predictor, and the model (GLM, GAM, RF) as well as the species  
251 ID as random effects. Coefficients are in relation to the performance of SDMs with the predictor  
252 set: mean.

### 253 Spatial comparison

254 The performance of SDMs is highly variable across the globe (Fig. 4). The mean predictor  
255 group generally performed worst in mountainous terrain, such as the Andes or the Himalayas,  
256 but also Madagascar showed low TSS and AUC scores (Fig. 4, Supplementary Fig. S2 for  
257 AUC). Including spatial variability in temperature and precipitation in SDMs improved the  
258 models in these areas, but showed a slight decline in performance in desert and arctic areas (Fig.  
259 4: TSS differences spatial-mean). Adding temporal variability to the models containing mean  
260 predictors resulted in improved SDM performance in almost all areas (Fig. 4: temporal-mean).  
261 Including all spatial and temporal predictors resulted in a slight improvement in the spatial  
262 model accuracies compared to including the temporal group with the mean predictor group (Fig.  
263 4: spatio temporal), yet the improvement compared to mean plus temporal SDM were small.  
264

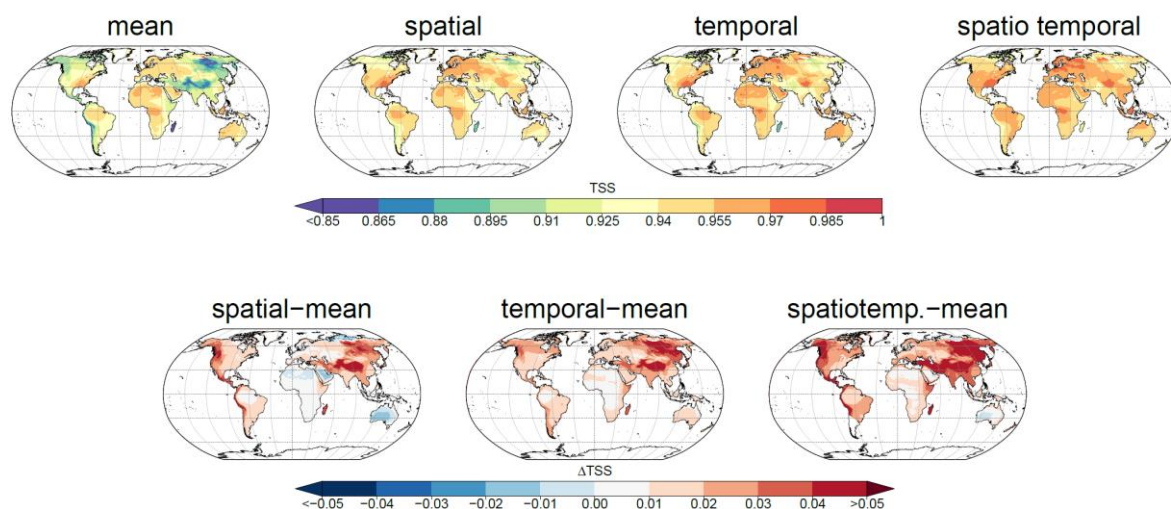



266 **Fig 4.** Spatial variation in mean TSS values per grid cell and TSS differences between models  
267 using different predictor groups. The upper row illustrates TSS averaged for all mammals,  
268 reptiles, and amphibians modeled for the four models using different predictor groups. The  
269 lower row illustrates the averaged TSS difference among all SDMs when adding either spatial,  
270 temporal or both spatial and temporal (spatiotemp.) predictors to SDMs based on mean  
271 predictors only.

## 272 **Discussion**

273 Including temporal variability of predictors into broad-scale SDMs leads to a greater  
274 improvement of model performance than the inclusion of sub-grain spatial variability of these  
275 predictors. These findings suggest that especially the inclusion of interannual climate variability  
276 has a large potential of improving the estimation of niche characteristics across a large range of  
277 taxa. Including temporal predictor variability increased the performance of SDMs in almost all  
278 areas across the globe, though to differing degrees. Especially prominent is the increase in areas  
279 with marked seasonality such as in tropical monsoon climates, tropical wet and dry climate, or  
280 areas that receive very infrequent precipitation such as the Horn of Africa (Beck *et al.*, 2018).  
281 Temporal variability does also increase the performance of SDMs in mountainous regions  
282 potentially indicating that temporal variability in a climate variable is also capable to capture  
283 the niche limitations that are otherwise captured by spatial heterogeneity. One reason for the  
284 performance gain when including temporal variability is that it expresses the degree of climatic  
285 extremes which can physiologically limit the distribution of species (Zimmermann *et al.*, 2009).  
286 Although, the degree to which extremes are represented in such variability predictors certainly  
287 depends on the temporal resolution of the climatic input dataset. In the case presented here, we  
288 used interannual variation, which means that extreme events are restricted to extremely dry or  
289 wet years, or extremely hot or cold years. Using more detailed temporal analyses would allow  
290 to refine the representation of climatic extremes further.

291 As expected, the inclusion of the spatial variability improves SDMs mainly in mountainous  
292 areas where climate is extremely heterogeneous over short distances. The improvement was  
293 specifically strong in tropical mountains where species usually occur in narrow elevational  
294 bands with little or no intra-annual variability (Janzen, 1967; Ghalambor *et al.*, 2006). In  
295 topographically less heterogeneous terrain however, we observed a decline in the predictive  
296 power of SDMs. Almost all over Africa, Australia, and the low elevation parts of Eurasia, and  
297 North America spatial variability has no effect, or even a negative effect on the performance of  
298 SDMs. In these areas spatial heterogeneity is low and inclusion of spatial variability in climate  
299 predictors seems biologically unimportant, which leads to a decrease in their performance

300 (Loehle & LeBlanc, 1996; Davis *et al.*, 1998; Vaughan & Ormerod, 2003; Dormann *et al.*,  
301 2012).

302

303 The increase in SDM performance is however not equal across the three taxonomic groups  
304 analyzed here. While amphibians and reptiles show a significantly higher SDM performance of  
305 the temporal predictor group over the spatial predictor group, mammal SDMs do not  
306 significantly differ when either spatial or temporal predictors are added to the mean predictor  
307 group. This difference might be explained by the differences in physiology between these  
308 groups. All three groups have evolved differently in response to their environment, with  
309 ectothermic groups being much less adaptable to climatic variations than endothermic groups  
310 (Rolland *et al.*, 2018). Such evolved differences in physiology ultimately affect how organisms  
311 interact with and are constrained by their environment (Buckley *et al.*, 2012). Ectothermic  
312 species for example cannot buffer climate variation as well as endothermic species (Clusella-  
313 Trullas *et al.*, 2011; Sunday *et al.*, 2011; Hoffmann *et al.*, 2013; Gunderson & Stillman, 2015)  
314 which have evolved the physiological capacity to regulate temperatures to some extent (Pither,  
315 2003). When building SDMs from climate means alone, thus neglecting the temporal dimension  
316 of predictors, we miss out on important climatic constraint especially for endothermic species  
317 distributions, ultimately limiting the accuracy of niche estimations (Zimmermann *et al.*, 2009).  
318 Model formulation and parametrization certainly plays a role in the observed differences  
319 between predictor groups. More predictors in a model usually lead to a better overall fit of a  
320 model (Brun *et al.*, 2019) which can partly explain the increase in predictive power when the  
321 predictors based on mean climate are complemented with either spatial or temporal variability.  
322 As both, the spatial and the temporal predictor groups have the same number of variables, this  
323 effect does not hold when comparing these two. Combining mean with spatial and temporal  
324 predictor groups however, lead to an additional improvement. At this point however, the  
325 parametrization of has not yet plateaued (Randin *et al.*, 2006; Chala *et al.*, 2016; Brun *et al.*,  
326 2019; Gregor *et al.*, 2019) and model performance still increases when using both spatial and  
327 temporal variability as predictors. Using different SDM algorithms mainly affects the absolute  
328 performance of the SDMs in terms of the specific test metric (AUC, TSS). However, it did not  
329 affect the relative difference in model performance between SDMs calculated from different  
330 predictor groups.

331 With an increasing need in biodiversity modeling for current, past, and future predictions a  
332 better understanding of the climatic predictors that quantify the ecological niche of a species is  
333 needed. Here, we show that specifically the inclusion of temporal variability offers a promising

334 improvement in modelling the current distribution of species. Yet, also the inclusion of spatial  
335 (sub-grain) variabilities can improve model accuracies, primarily mountains and most clearly  
336 in tropical mountains. In summary, we anticipate that a more detailed inclusion of the temporal  
337 variability of climate variables offers a highly promising avenue for improving species  
338 distribution modelling in the future.

### 339 **Data Accessibility Statement**

340 The data that support the findings of this study are openly available in EnviDat (envidat.ch) at  
341 <http://doi.org/XXXXXX>. Codes related to this study will be available on Zenodo at  
342 <http://doi.org/YYYYYYYY>

### 343 **Acknowledgements**

344 D.N.K. & N.E.Z. acknowledge funding from: The WSL internal grants exCHELSA, as well as  
345 funding through the 2019-2020 BiodivERsA joint call for research proposals, under the  
346 BiodivClim ERA-Net COFUND program, and with the funding organisations Swiss National  
347 Science Foundation SNF (project: FeedBaCks, 193907), D.N.K., N.E.Z., & D.Z. acknowledge  
348 funding from the Swiss Data Science Projects: SPEEDMIND, and COMECO. D.N.K. &  
349 C.H.G. acknowledges funding to the ERA-Net BiodivERsA -Belmont Forum, with the national  
350 funder Swiss National Foundation (20BD21\_184131), part of the 2018 Joint call BiodivERsA-  
351 Belmont Forum call (project 'FutureWeb'). DZ also acknowledges funding from the German  
352 Science Foundation (ZU 361/1-1).

### 353 **Author contributions:**

354 D.N.K. and N.E.Z. developed the idea with input from all co-authors, D.N.K., L.M. and R.O.W.  
355 implemented the species distribution modelling, B.S. and D.N.K. analyzed the results further,  
356 D.N.K. wrote the first draft of the manuscript, and all authors contributed equally to the  
357 revisions.

### 358 **Biosketch:**

359 Dirk Nikolaus Karger is a senior researcher at the Swiss Federal Research Institute WSL and  
360 mainly interested in the impact climate has on global ecosystems and species. The author  
361 consortium binds a strong interest in species distribution modelling.



## 362 References

- 363 Alexander, J.M., Diez, J.M. & Levine, J.M. (2015) Novel competitors shape species' responses to  
364 climate change. *Nature*, **525**, 515–518.
- 365 Allouche, O., Tsoar, A. & Kadmon, R. (2006) Assessing the accuracy of species distribution models:  
366 prevalence, kappa and the true skill statistic (TSS). *Journal of Applied Ecology*, **43**, 1223–  
367 1232.
- 368 Araújo, M.B. & Guisan, A. (2006) Five (or so) challenges for species distribution modelling. *Journal*  
369 *of Biogeography*, **33**, 1677–1688.
- 370 Ashcroft, M.B., French, K.O. & Chisholm, L.A. (2011) An evaluation of environmental factors  
371 affecting species distributions. *Ecological Modelling*, **222**, 524–531.
- 372 Barbet-Massin, M., Jiguet, F., Albert, C.H. & Thuiller, W. (2012) Selecting pseudo-absences for  
373 species distribution models: how, where and how many? *Methods in Ecology and Evolution*,  
374 **3**, 327–338.
- 375 Bates, D., Mächler, M., Bolker, B. & Walker, S. (2015) Fitting Linear Mixed-Effects Models Using  
376 lme4. *Journal of Statistical Software*, **67**, 1–48.
- 377 Beck, H.E., Zimmermann, N.E., McVicar, T.R., Vergopolan, N., Berg, A. & Wood, E.F. (2018)  
378 Present and future Köppen-Geiger climate classification maps at 1-km resolution. *Scientific*  
379 *Data*, **5**, 180214.
- 380 Breiman, L. (2001) *Random Forests*. *Machine Learning*, pp. 5–32.
- 381 Brun, P., Thuiller, W., Chauvier, Y., Pellissier, L., Wüest, R.O., Wang, Z. & Zimmermann, N.E.  
382 (2019) Model complexity affects species distribution projections under climate change.  
383 *Journal of Biogeography*.
- 384 Buckley, L.B., Hurlbert, A.H. & Jetz, W. (2012) Broad-scale ecological implications of ectothermy  
385 and endothermy in changing environments. *Global Ecology and Biogeography*, **21**, 873–885.
- 386 Cadena, C.D., Kozak, K.H., Gomez, J.P., Parra, J.L., McCain, C.M., Bowie, R.C.K., Carnaval, A.C.,  
387 Moritz, C., Rahbek, C., Roberts, T.E., Sanders, N.J., Schneider, C.J., VanDerWal, J.,  
388 Zamudio, K.R. & Graham, C.H. (2012) Latitude, elevational climatic zonation and speciation  
389 in New World vertebrates. *Proceedings of the Royal Society B: Biological Sciences*, **279**, 194–  
390 201.
- 391 Chala, D., Brochmann, C., Psomas, A., Ehrich, D., Gizaw, A., Masao, C.A., Bakkestuen, V. &  
392 Zimmermann, N.E. (2016) Good-bye to tropical alpine plant giants under warmer climates?  
393 Loss of range and genetic diversity in *Lobelia rhynchopetalum*. *Ecology and evolution*, **6**,  
394 8931–8941.
- 395 Clusella-Trullas, S., Blackburn, T.M. & Chown, S.L. (2011) Climatic Predictors of Temperature  
396 Performance Curve Parameters in Ectotherms Imply Complex Responses to Climate Change.  
397 *The American Naturalist*, **177**, 738–751.
- 398 Davis, A.J., Jenkinson, L.S., Lawton, J.H., Shorrocks, B. & Wood, S. (1998) Making mistakes when  
399 predicting shifts in species range in response to global warming. *Nature*, **391**, 783–786.
- 400 Dormann, C.F., Schymanski, S.J., Cabral, J., Chuine, I., Graham, C., Hartig, F., Kearney, M., Morin,  
401 X., Römermann, C., Schröder, B. & Singer, A. (2012) Correlation and process in species  
402 distribution models: bridging a dichotomy. *Journal of Biogeography*, **39**, 2119–2131.
- 403 Fick, S.E. & Hijmans, R.J. (2017) WorldClim 2: new 1-km spatial resolution climate surfaces for  
404 global land areas. *International Journal of Climatology*, **37**, 4302–4315.
- 405 Fritz, S.A. & Rahbek, C. (2012) Global patterns of amphibian phylogenetic diversity. *Journal of*  
406 *Biogeography*, **39**, 1373–1382.
- 407 Ghalambor, C.K., Huey, R.B., Martin, P.R., Tewksbury, J.J. & Wang, G. (2006) Are mountain passes  
408 higher in the tropics? Janzen's hypothesis revisited. *Integrative and Comparative Biology*, **46**,  
409 5–17.
- 410 Gregr, E.J., Palacios, D.M., Thompson, A. & Chan, K.M. (2019) Why less complexity produces better  
411 forecasts: an independent data evaluation of kelp habitat models. *Ecography*, **42**, 428–443.
- 412 Guisan, A. & Thuiller, W. (2005) Predicting species distribution: offering more than simple habitat  
413 models. *Ecology letters*, **8**, 993–1009.
- 414 Guisan, A. & Zimmermann, N.E. (2000) Predictive habitat distribution models in ecology. *Ecological*  
415 *Modelling*, **135**, 147–186.

- 416 Gunderson, A.R. & Stillman, J.H. (2015) Plasticity in thermal tolerance has limited potential to buffer  
417 ectotherms from global warming. *Proceedings of the Royal Society B: Biological Sciences*,  
418 **282**, 20150401.
- 419 Hastie, T.J. & Tibshirani, R.J. (1990) *Generalized Additive Models*,.
- 420 Hijmans, R.J., Cameron, S.E., Parra, J.L., Jones, P.G. & Jarvis, A. (2005) Very high resolution  
421 interpolated climate surfaces for global land areas. *International Journal of Climatology*, **25**,  
422 1965–1978.
- 423 Hijmans, R.J. & van Etten, J. (2014) raster: Geographic data analysis and modeling. *R package*  
424 *version*, **2**, 15.
- 425 Hoffmann, A.A., Chown, S.L. & Clusella-Trullas, S. (2013) Upper thermal limits in terrestrial  
426 ectotherms: how constrained are they? *Functional Ecology*, **27**, 934–949.
- 427 Hourdin, F., Mauritsen, T., Gettelman, A., Golaz, J.-C., Balaji, V., Duan, Q., Folini, D., Ji, D., Klocke,  
428 D., Qian, Y., Rauser, F., Rio, C., Tomassini, L., Watanabe, M. & Williamson, D. (2017) The  
429 Art and Science of Climate Model Tuning. *Bulletin of the American Meteorological Society*,  
430 **98**, 589–602.
- 431 Hurlbert, A.H. & Jetz, W. (2007) Species richness, hotspots, and the scale dependence of range maps  
432 in ecology and conservation. *Proceedings of the National Academy of Sciences*, **104**, 13384–  
433 13389.
- 434 Hutchinson, G.E. (1957) POPULATION STUDIES - ANIMAL ECOLOGY AND DEMOGRAPHY -  
435 CONCLUDING REMARKS. *Cold Spring Harbor Symposia on Quantitative Biology*, **22**,  
436 415–427.
- 437 IUCN (2016) IUCN Red List of Threatened Species , version 2016.1; available at  
438 <http://www.iucnredlist.org>.
- 439 Janzen, D.H. (1967) Why Mountain Passes are Higher in the Tropics. *The American Naturalist*, **101**,  
440 233–249.
- 441 Karger, D.N., Conrad, O., Böhner, J., Kawohl, T., Kreft, H., Soria-Auza, R.W., Zimmermann, N.E.,  
442 Linder, H.P. & Kessler, M. (2017a) Climatologies at high resolution for the earth's land  
443 surface areas. *Scientific Data*, **4**, 170122.
- 444 Karger, D.N., Conrad, O., Böhner, J., Kawohl, T., Kreft, H., Soria-Auza, R.W., Zimmermann, N.E.,  
445 Linder, H.P. & Kessler, M. (2017b) *Climatologies at high resolution for the earth's land*  
446 *surface areas*, Dryad Digital Repository.
- 447 Kozak, K.H. & Wiens, J.J. (2010) Accelerated rates of climatic-niche evolution underlie rapid species  
448 diversification. *Ecology Letters*, **13**, 1378–1389.
- 449 Liu, H., Ye, Q. & Wiens, J.J. (2020) Climatic-niche evolution follows similar rules in plants and  
450 animals. *Nature Ecology & Evolution*, **4**, 753–763.
- 451 Loehle, C. & LeBlanc, D. (1996) Model-based assessments of climate change effects on forests: a  
452 critical review. *Ecological Modelling*, **90**, 1–31.
- 453 McNab, B.K. (1978) The Evolution of Endothermy in the Phylogeny of Mammals. *The American*  
454 *Naturalist*, **112**, 1–21.
- 455 Nelder, J.A. & Wedderburn, R.W.M. (1972) Generalized Linear Models. *Journal of the Royal*  
456 *Statistical Society. Series A (General)*, **135**, 370–384.
- 457 Pither, J. (2003) Climate tolerance and interspecific variation in geographic range size. *Proceedings of*  
458 *the Royal Society of London. Series B: Biological Sciences*, **270**, 475–481.
- 459 R Core Team (2015) R: A language and environment for statistical computing. *R Foundation for*  
460 *Statistical Computing, Vienna, Austria*. URL <http://www.R-project.org/>.
- 461 Rahbek, C. (2005) The role of spatial scale and the perception of large-scale species-richness patterns.  
462 *Ecology Letters*, **8**, 224–239.
- 463 Rahmstorf, S. & Coumou, D. (2011) Increase of extreme events in a warming world. *Proceedings of*  
464 *the National Academy of Sciences of the United States of America*, **108**, 17905–17909.
- 465 Randin, C.F., Dirnböck, T., Dullinger, S., Zimmermann, N.E., Zappa, M. & Guisan, A. (2006) Are  
466 niche-based species distribution models transferable in space? *Journal of Biogeography*, **33**,  
467 1689–1703.
- 468 randomForest: Breiman and Cutler's Random Forests for Classification and Regression.
- 469 Reyer, C.P.O., Leuzinger, S., Rammig, A., Wolf, A., Bartholomeus, R.P., Bonfante, A., de Lorenzi, F.,  
470 Dury, M., Gloning, P., Abou Jaoudé, R., Klein, T., Kuster, T.M., Martins, M., Niedrist, G.,  
471 Riccardi, M., Wohlfahrt, G., de Angelis, P., de Dato, G., François, L., Menzel, A. & Pereira,

- 472 M. (2013) A plant's perspective of extremes: terrestrial plant responses to changing climatic  
473 variability. *Global Change Biology*, **19**, 75–89.
- 474 Rolland, J., Silvestro, D., Schluter, D., Guisan, A., Broennimann, O. & Salamin, N. (2018) The impact  
475 of endothermy on the climatic niche evolution and the distribution of vertebrate diversity.  
476 *Nature Ecology & Evolution*, **2**, 459–464.
- 477 Ruben, J. (1995) The evolution of endothermy in mammals and birds: from physiology to fossils.  
478 *Annual Review of Physiology*, **57**, 69–95.
- 479 Schär, C., Fuhrer, O., Arteaga, A., Ban, N., Charpilloz, C., Di Girolamo, S., Hentgen, L., Hoefler, T.,  
480 Lapillonne, X., Leutwyler, D., Osterried, K., Panosetti, D., Rüdüsühli, S., Schlemmer, L.,  
481 Schulthess, T., Sprenger, M., Ubbiali, S. & Wernli, H. (2019) Kilometer-scale climate models:  
482 Prospects and challenges. *Bulletin of the American Meteorological Society*, **101**.
- 483 Seneviratne, S.I., Nicholls, N., Easterling, D., Goodess, C.M., Kanae, S., Kossin, J., Luo, Y., Marengo,  
484 J., McInnes, K., Rahimi, M., Reichstein, M., Sorteberg, A., Vera, C. & Zhang, X. (2012)  
485 *Changes in climate extremes and their impacts on the natural physical environment.*  
486 *Managing the Risks of Extreme Events and Disasters to Advance Climate Change Adaptation*  
487 (ed. by C.B. Field), V. Barros), T.F. Stocker), D. Qin), D.J. Dokken), K.L. Ebi), M.D.  
488 Mastrandrea), K.J. Mach), G.-K. Plattner), S.K. Allen), M. Tignor), and P.M. Midgley), pp.  
489 109–230. A Special Report of Working Groups I and II of the Intergovernmental Panel on  
490 Climate Change (IPCC), Cambridge University Press, Cambridge, UK, and New York, NY,  
491 USA.
- 492 Stein, A., Gerstner, K. & Kreft, H. (2014) Environmental heterogeneity as a universal driver of species  
493 richness across taxa, biomes and spatial scales. *Ecology Letters*, **17**, 866–880.
- 494 Stein, A. & Kreft, H. (2015) Terminology and quantification of environmental heterogeneity in  
495 species-richness research. *Biological Reviews*, **90**, 815–836.
- 496 Stevens, G.C. (1989) The Latitudinal Gradient in Geographical Range: How so Many Species Coexist  
497 in the Tropics. *The American Naturalist*, **133**, 240–256.
- 498 Sunday, J.M., Bates, A.E. & Dulvy, N.K. (2011) Global analysis of thermal tolerance and latitude in  
499 ectotherms. *Proceedings of the Royal Society B: Biological Sciences*, **278**, 1823–1830.
- 500 Swets, J.A. (1988) Measuring the accuracy of diagnostic systems. *Science*, **240**, 1285–1293.
- 501 Thuiller, W., Guéguen, M., Renaud, J., Karger, D.N. & Zimmermann, N.E. (2019) Uncertainty in  
502 ensembles of global biodiversity scenarios. *Nature Communications*, **10**, 1446.
- 503 Vaughan, I.P. & Ormerod, S.J. (2003) Improving the Quality of Distribution Models for Conservation  
504 by Addressing Shortcomings in the Field Collection of Training Data. *Conservation Biology*,  
505 **17**, 1601–1611.
- 506 Wiens, J.A. (1989) Spatial Scaling in Ecology. *Functional Ecology*, **3**, 385–397.
- 507 Wood, S. & Wood, M.S. (2015) Package 'mgcv.' *R package version*, **1**, 29.
- 508 Woodward, F.I. & Woodward, F.I. (1987) *Climate and plant distribution*, Cambridge University  
509 Press.
- 510 Zimmermann, N.E., Yoccoz, N.G., Edwards, T.C., Meier, E.S., Thuiller, W., Guisan, A., Schmatz,  
511 D.R. & Pearman, P.B. (2009) Climatic extremes improve predictions of spatial patterns of tree  
512 species. *Proceedings of the National Academy of Sciences*, **106**, 19723–19728.
- 513 Zurell, D., Franklin, J., König, C., Bouchet, P.J., Dormann, C.F., Elith, J., Fandos, G., Feng, X.,  
514 Guillera-Arroita, G., Guisan, A., Lahoz-Monfort, J.J., Leitão, P.J., Park, D.S., Peterson, A.T.,  
515 Rapacciuolo, G., Schmatz, D.R., Schröder, B., Serra-Diaz, J.M., Thuiller, W., Yates, K.L.,  
516 Zimmermann, N.E. & Merow, C. (2020) A standard protocol for reporting species distribution  
517 models. *Ecography*, **43**, 1261–1277.
- 518 Zurell, D., Graham, C.H., Gallien, L., Thuiller, W. & Zimmermann, N.E. (2018) Long-distance  
519 migratory birds threatened by multiple independent risks from global change. *Nature Climate*  
520 *Change*, **8**, 992–996.
- 521
- 522

523 **Appendices**

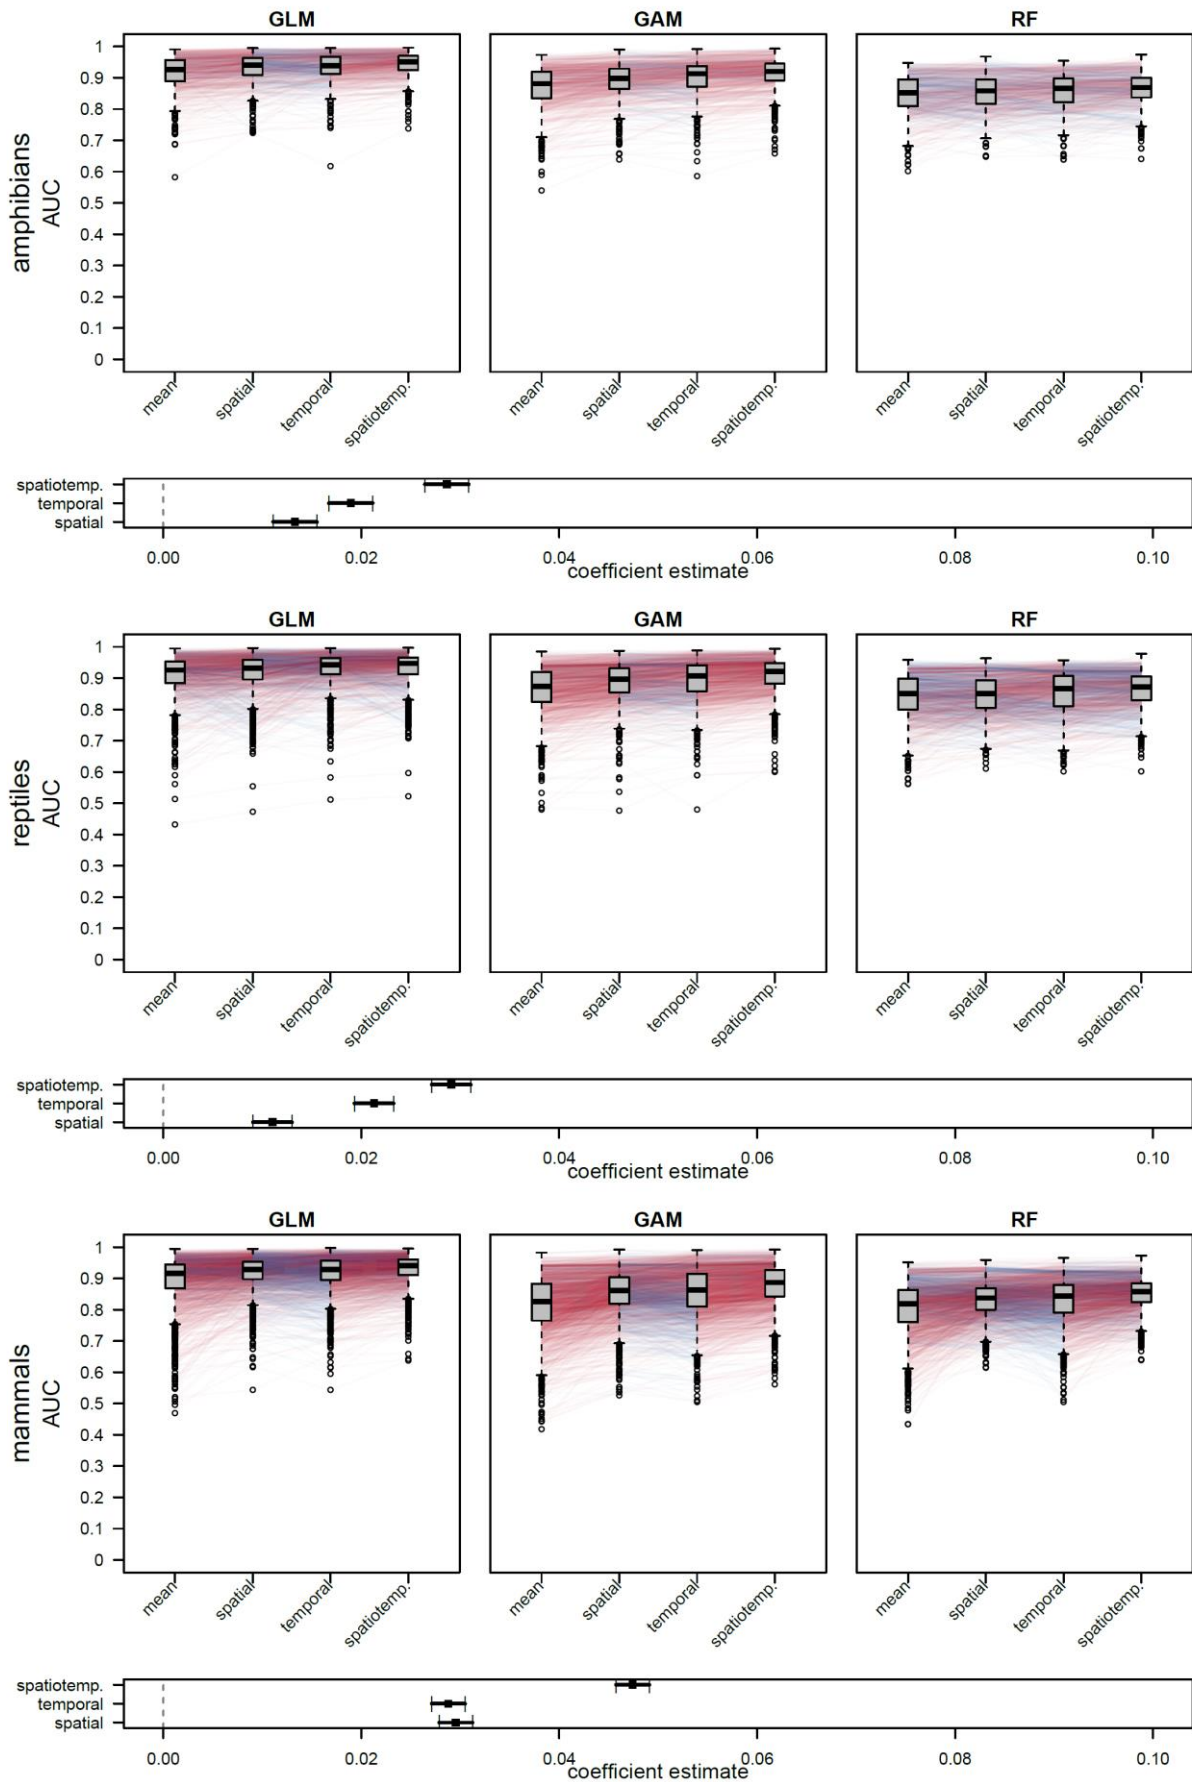

525 **Fig. S1.** Comparison of the performance of three different SDM algorithms (GLM =  
526 Generalized linear model, GAM = Generalized additive model, RF = Random Forests)  
527 calculated with four different sets of predictors for amphibians, reptiles, and mammals  
528 measured by the Area Under the Curve (AUC). Colored lines connect pairs of SDMs based on  
529 different predictor sets for the same species, with red and blue lines indicating pairs in which  
530 AUC values increased and decreased between predictor groups from left to right. Plots below  
531 the boxplots shows the coefficient estimates of a linear mixed effects model with AUC as  
532 response, the groups (mean, spatial, temporal, spatiotemp.) as predictor, and the model (GLM,  
533 GAM, RF) as well as the species ID as random effects. Coefficients are in relation to the  
534 performance of SDMs with the predictor set: mean.  
535



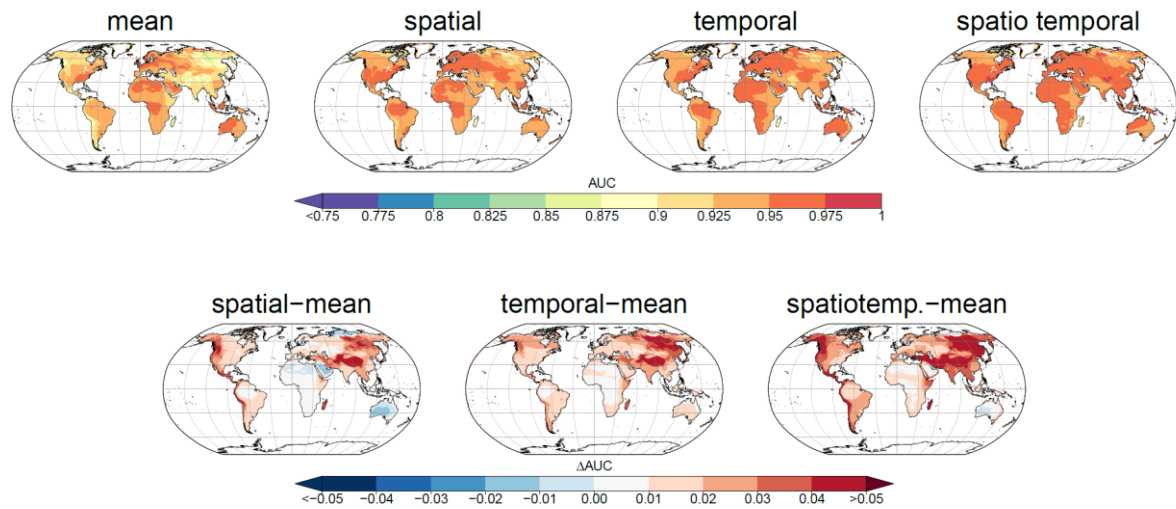

536

537 **Fig S2.** Spatial variation in mean AUC values per grid cell and AUC differences between  
538 models using different predictor groups. The upper row illustrates AUC averaged for all  
539 mammals, reptiles, and amphibians modeled for the four models using different predictor  
540 groups. The lower row illustrates the averaged AUC difference among all SDMs when adding  
541 either spatial, temporal or both spatial and temporal (spatiotemp.) predictors to SDMs based on  
542 mean predictors only.

543
